# Supplementary material for: Inorganic nanotubes formation through the synergic evolution of dynamic templates and metallophosphates: from vesicles to nanotubes
Source: Royal Society of Chemistry journal article supplement (doi:10.1039/c1cc12850g), 2011-01-01
Supplement: c1cc12850g.pdf [file c1cc12850g.pdf]

### Supplementary Information:

## Inorganic Nanotubes Formation through the Synergic Evolution of Dynamic Template and Metallophosphate: From Vesicle to Nanotube

Xiangke Guo, Xuefeng Guo\*, Wenmei Tao, Lanhua Chen, Luming Peng and Weiping Ding

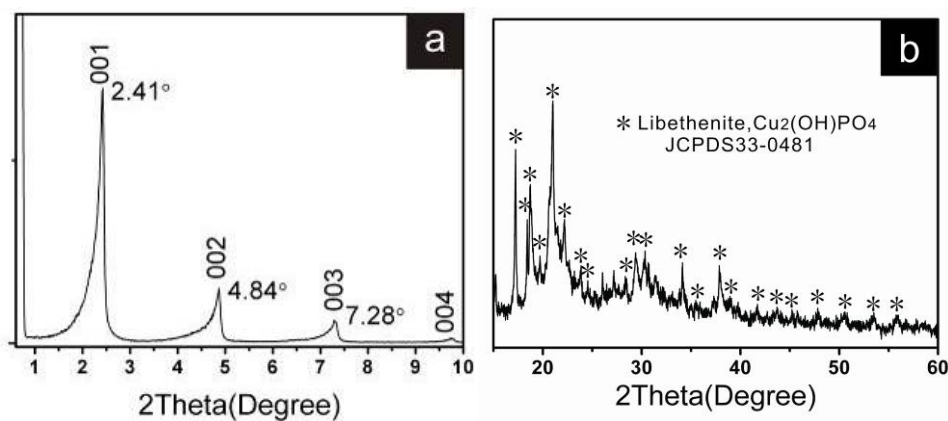

**Fig. S1** XRD patterns of the sample synthesized at 383 K for 2 days with mixed organoamines (~9.0/1.0 of C<sub>12</sub>H<sub>25</sub>NH<sub>2</sub>/C<sub>16</sub>H<sub>33</sub>NH<sub>2</sub>). (a) small angle XRD (SAXRD), (b) wide angle XRD (WAXRD).

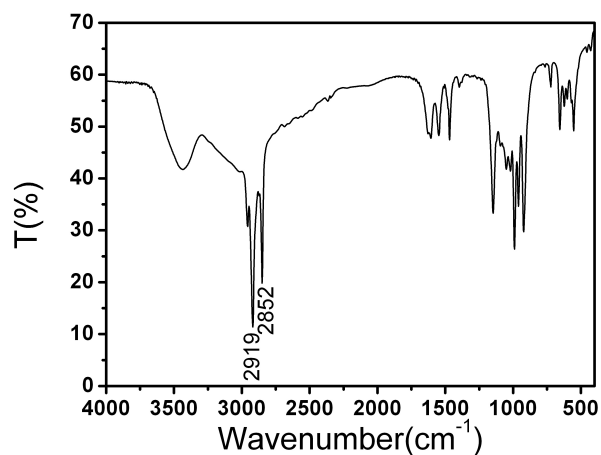

**Fig. S2** IR spectra of the nanotubes after hydrothermal treatment of 2 days. The strong signals at 2850 and 2920 cm<sup>-1</sup> correspond to the CH<sub>2</sub> groups of the organoamines.

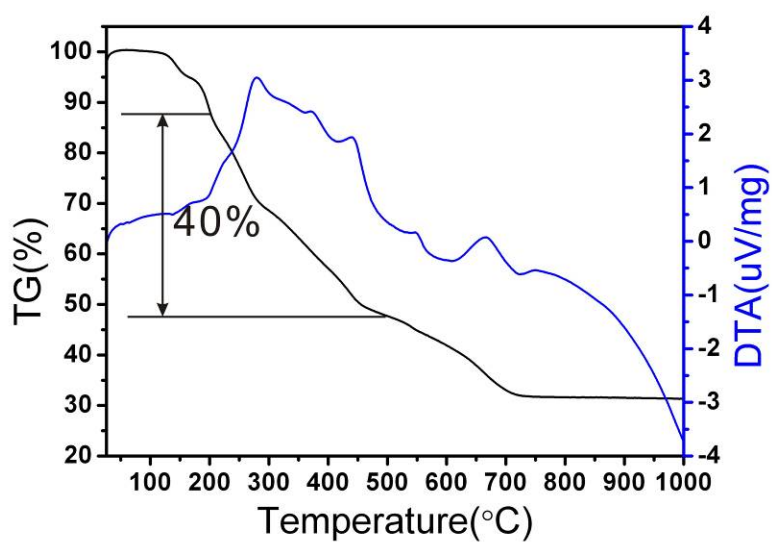

**Fig. S3** TG/DTA curves of the nanotubes synthesized at 383 K for 2 days with the mixed organoamines ( $C_{12}H_{25}NH_2/C_{16}H_{33}NH_2 = 9/1$ ).

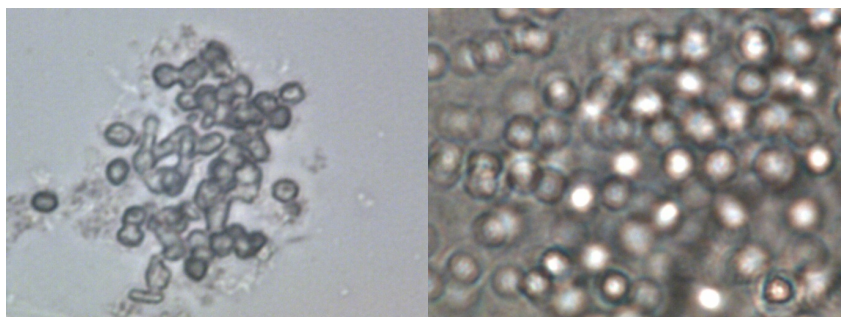

**Fig. S4** Optical microscope images of the vesicle intermediates during the process of slow addition of the organoamines (magnification times: 1000 $\times$ ): (a) 4 h; (b) 6 h.

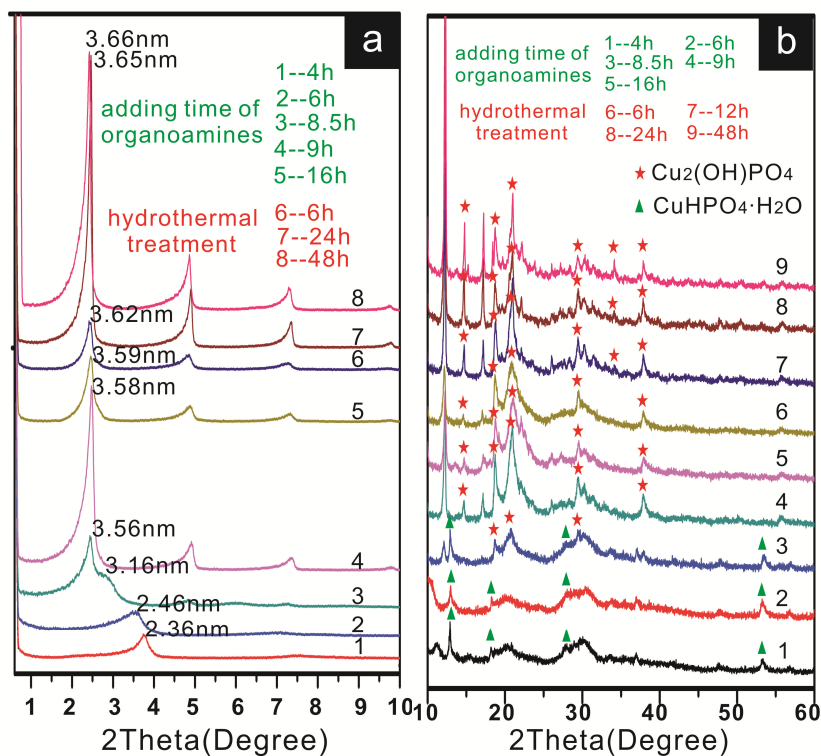

**Fig. S5** XRD patterns of the sample synthesized at 383 K for various periods of time in the synthesis process with mixed organoamines (~9.0/1.0 of C<sub>12</sub>H<sub>25</sub>NH<sub>2</sub>/C<sub>16</sub>H<sub>33</sub>NH<sub>2</sub>) and hydrothermal treatment. (a) SAXRD, (b) WAXRD.

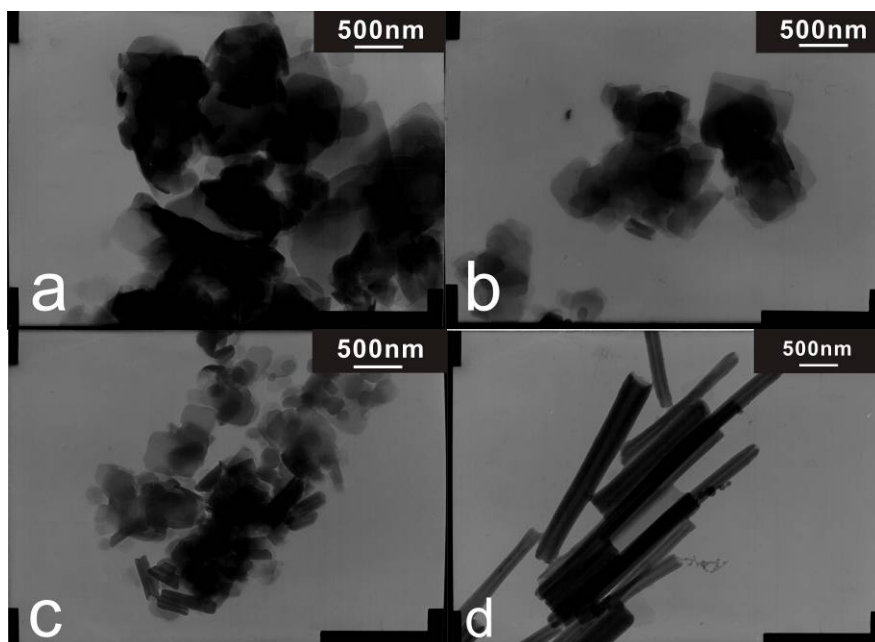

**Fig. S6** TEM images of the resultant samples hydrothermally treated at 383 K for 2 days with the precursors obtained under varied adding rates of mixed organoamines (C<sub>12</sub>H<sub>25</sub>NH<sub>2</sub>/C<sub>16</sub>H<sub>33</sub>NH<sub>2</sub> = 9/1): (a) immediately; (b) 1 ml/min; (c) 0.1 ml/min; and (d) 0.025 ml/min.
